# Supplementary material
Source: PubMed Central journal article supplement (PMC6919564)
Supplement: NIHMS1528071-supplement-Supp_Table_1.pdf [file NIHMS1528071-supplement-Supp_Table_1.pdf]

**Supplementary Table 1 | The calculated energies of the various conformations of PF846.**

| Molecule name              | Energy (kcal/mol) |
|----------------------------|-------------------|
| Optimized_X-ray_molecule_1 | -1110331.97       |
| Optimized_X-ray_molecule_2 | -1110333.04       |
| Pose 1                     | -1110331.49       |
| Pose 2                     | -1110331.64       |
| Pose 3                     | -1110333.24       |
| Pose 4                     | -1110333.59       |
